# Supplementary material
Source: HighWire-hosted journal article supplement (https://stke.sciencemag.org/content/suppl/2018/04/20/11.527.eaaq1616)
Supplement: aaq1616_SM.pdf [file aaq1616_SM.pdf]

## Supplementary Materials for

### **A defect in KCa3.1 channel activity limits the ability of CD8<sup>+</sup> T cells from cancer patients to infiltrate an adenosine-rich microenvironment**

Ameet A. Chimote, Andras Balajthy, Michael J. Arnold, Hannah S. Newton, Peter Hajdu, Julianne Qualtieri, Trisha Wise-Draper, Laura Conforti\*

\*Corresponding author. Email: [laura.conforti@uc.edu](mailto:laura.conforti@uc.edu)

Published 24 April 2018, *Sci. Signal.* **11**, eaq1616 (2018)

DOI: 10.1126/scisignal.aq1616

#### **This PDF file includes:**

Fig. S1. HD and HNSCC CD8<sup>+</sup> T cells chemotax toward CXCL12.

Fig. S2. KCa3.1 channel blockade inhibits the chemotaxis of HD and HNSCC CD8<sup>+</sup> T cells.

Fig. S3. Activation of CD8<sup>+</sup> T cells from HD and HNSCC patients.

Fig. S4. Activation of KCa3.1 channels by NS309 restores the chemotaxis of HNSCC CD8<sup>+</sup> T cells in the presence of adenosine.

Table S1. Clinicopathologic characteristics of individual HNSCC patients.

Table S2. CD8<sup>+</sup> T cells from HDs and HNSCC patients chemotax toward CXCL12 similarly.

Table S3. Electrophysiological parameters of resting and activated CD8<sup>+</sup> T cells isolated from HD and HNSCC patients.

## Supplementary Materials

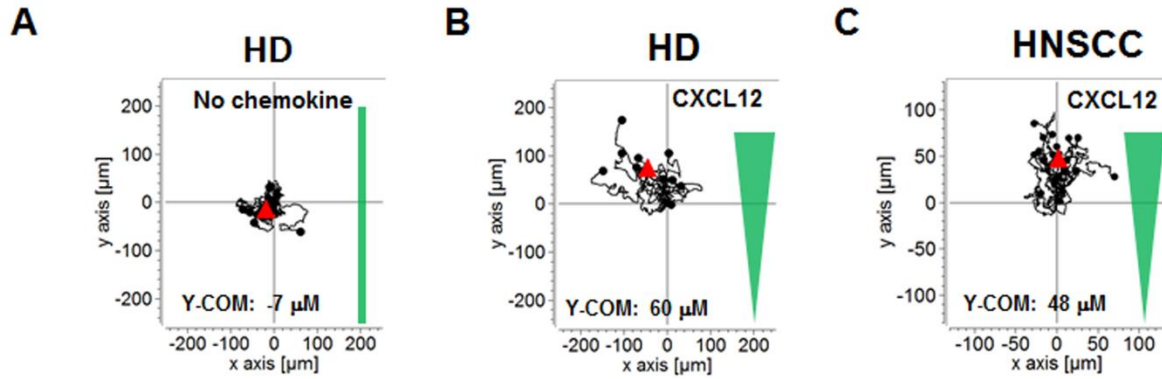

**Fig. S1. HD and HNSCC CD8<sup>+</sup> T cells chemotax toward CXCL12.** (A) Trajectories of HD CD8<sup>+</sup> T cells migrating in the absence of a chemokine. (B and C) Trajectories of HD (B) and HNSCC (C) CD8<sup>+</sup> T cells migrating towards CXCL12. Trajectories of at least 15-20 cells are shown for each condition and the starting point of each cell trajectory is artificially set to the same origin. Data are representative of 5 HD and 6 HNSCC patients. The red triangles represent Y-COM values.

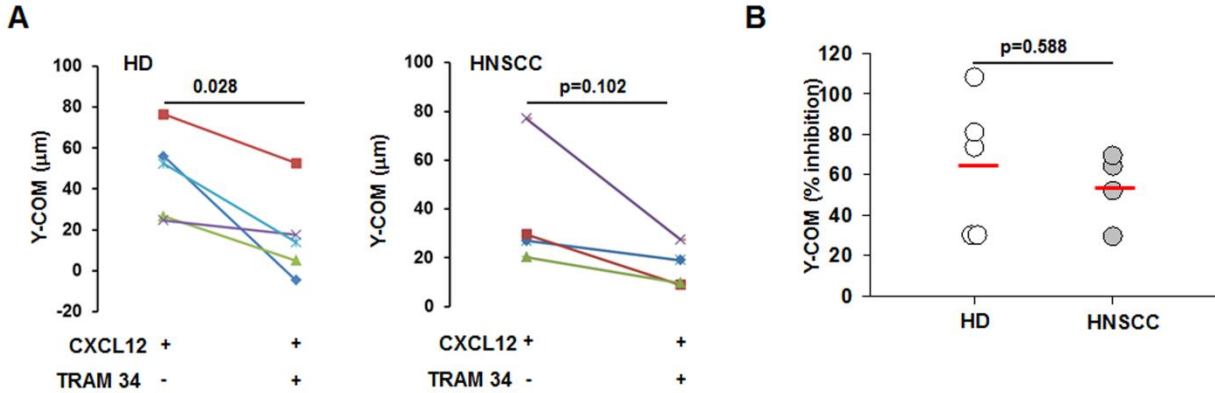

**Fig. S2. KCa3.1 channel blockade inhibits the chemotaxis of HD and HNSCC CD8<sup>+</sup> T cells.**

(A) The Y-COM values for CD8<sup>+</sup> T cells from HD and HNSCC patients migrating towards CXCL12 or CXCL12 and TRAM-34 (1  $\mu\text{M}$ , n=5 HD and n=4 HNSCC patients). (B) Percentage inhibition in the Y-COM values in the presence of 1 $\mu\text{M}$  TRAM-34. Horizontal red line represents mean values for each group. Statistical significance was determined by Student's t-test.

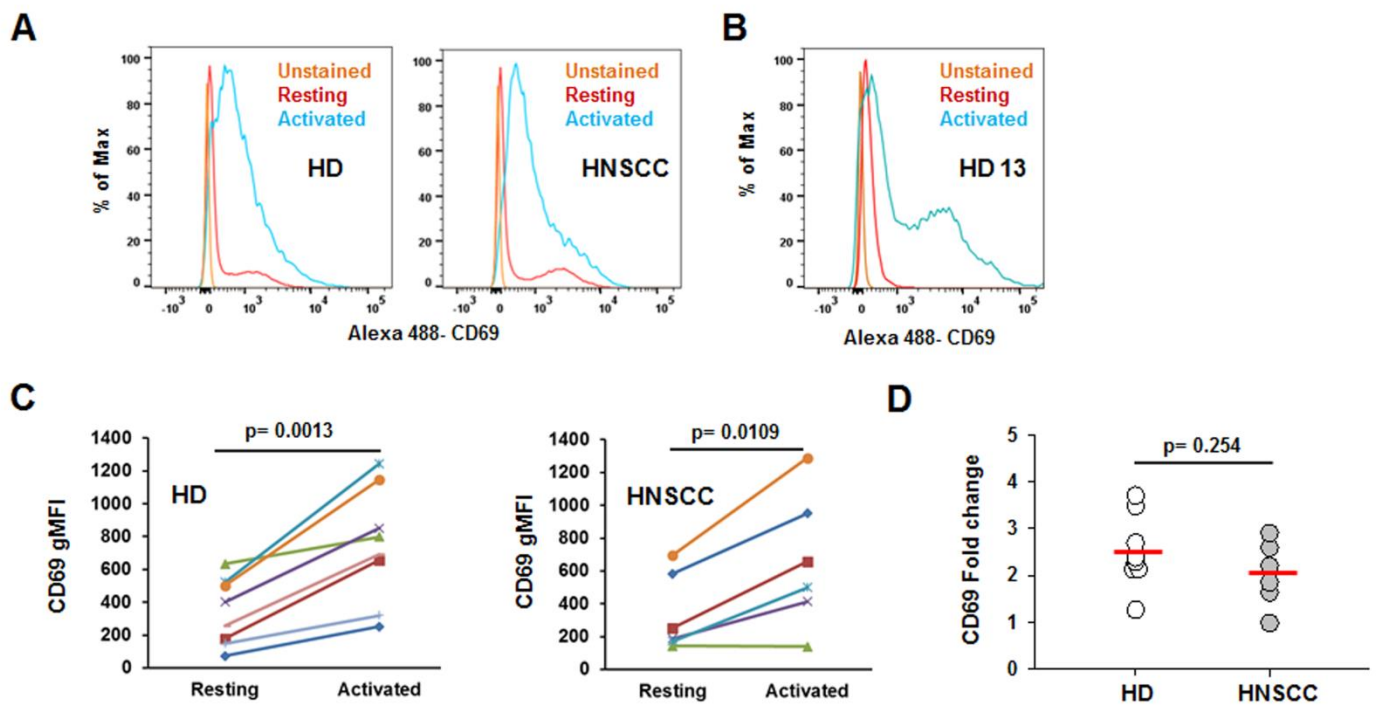

**Fig. S3. Activation of CD8<sup>+</sup> T cells from HD and HNSCC patients.** (A and B) Representative flow cytometry histograms showing CD69 expression in resting and activated CD8<sup>+</sup> T cells from a representative HD and HNSCC patient. (B) The histogram of one healthy donor (HD-13) showed a bi-modal distribution in the CD69 fluorescence. All of the other HD's as well as HNSCC patients showed a normal distribution in the CD69 fluorescence histograms. (C) To account for this non-normal distribution, the geometric mean of the CD69 fluorescence intensity (CD69 gMFI) was calculated for all resting and activated CD8<sup>+</sup> T cells from HD (n=8 donors) and HNSCC patients (n=6 patients). (D) Fold change in CD69 expression (ratio between resting and activated CD69 gMFI for the same individual) in CD8<sup>+</sup> T cells from HD (n=8) and HNSCC (n=6) from data shown in C. Horizontal red line represents mean values for each group. Data in C were analyzed by paired Student's t-test and data in D were analyzed by unpaired Students' t-test.

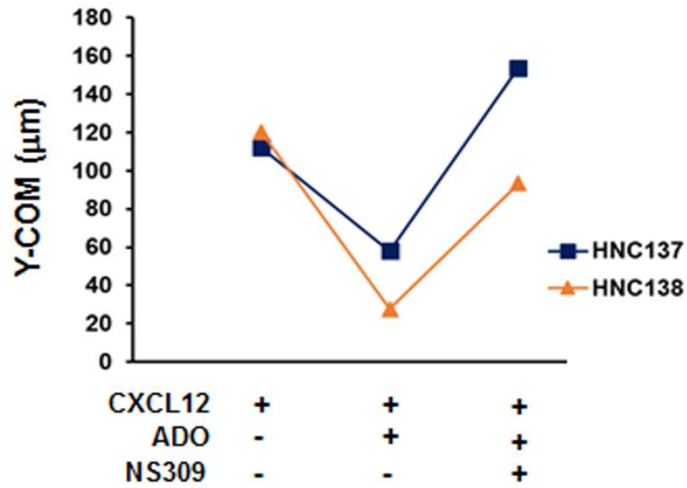

**Fig. S4. Activation of KCa3.1 channels by NS309 restores the chemotaxis of HNSCC CD8<sup>+</sup> T cells in the presence of adenosine.** The Y-COM values calculated for HNSCC CD8<sup>+</sup> T cells migrating towards CXCL12 or CXCL12 and adenosine, with or without preincubation with 1  $\mu$ M NS309. Chemotaxis was analyzed in 15 cells per condition in 2 HNSCC patients.

**Table S1. Clinicopathologic characteristics of individual HNSCC patients.** The tumor location, clinical staging, HPV status (p16 status), tumor differentiation, and disease progression information for the 39 HNSCC patients used in this study. Time to median follow up for HNSCC patients was 9.5 months (Range 2-58 months). CD73 expression and CD8<sup>+</sup> T cell infiltration in tumor biopsy specimens are determined by immunohistochemistry. N/A= data not available.

|    | Patient ID | Head and Neck Disease Site | Clinical Stage | p16 Status | Differentiation                     | Disease Progression | CD73 expression |        | CD8 infiltration |
|----|------------|----------------------------|----------------|------------|-------------------------------------|---------------------|-----------------|--------|------------------|
|    |            |                            |                |            |                                     |                     | Tumor           | Stroma |                  |
| 1  | HNC-01     | Oropharynx                 | T1N1M0         | Pos        | Poorly differentiated               | N                   | Low             | High   | Low              |
| 2  | HNC-03     | Oropharynx                 | T2N2BM0        | Pos        | Moderately differentiated           | N                   | Low             | High   | High             |
| 3  | HNC-05     | Oral Cavity                | T4bN3M0        | Neg        | Moderately differentiated           | Y                   | Low             | Low    | N/A              |
| 4  | HNC-06     | Larynx                     | T1N0M0         | Neg        | Moderately differentiated           | N                   | Low             | High   | Low              |
| 5  | HNC-12     | Oropharynx                 | T3N2aM0        | Neg        | Poorly to moderately differentiated | Y                   | N/A             | N/A    | N/A              |
| 6  | HNC-32     | Larynx                     | T3N0M0         | Neg        | Poorly differentiated               | N                   | N/A             | N/A    | N/A              |
| 7  | HNC-37     | Larynx                     | T4N2cM0        | Neg        | Poorly to moderately differentiated | N                   | Low             | Low    | Low              |
| 8  | HNC-39     | Oral Cavity                | T4aN0M0        | Neg        | Moderately differentiated           | Y                   | N/A             | N/A    | N/A              |
| 9  | HNC-42     | Oral Cavity                | T4bN2bM0       | Neg        | Moderately differentiated           | Y                   | N/A             | N/A    | N/A              |
| 10 | HNC-43     | Larynx                     | T2N1M0         | N/A        | Moderately differentiated           | N                   | N/A             | N/A    | N/A              |

|    |        |             |          |     |                                     |   |      |      |      |
|----|--------|-------------|----------|-----|-------------------------------------|---|------|------|------|
| 11 | HNC-47 | Oral Cavity | T3N0M0   | N/A | Moderately differentiated           | N | Low  | N/A  | High |
| 12 | HNC-48 | Larynx      | T4N2bM0  | Neg | Poorly to moderately differentiated | Y | N/A  | N/A  | N/A  |
| 13 | HNC-49 | Oral Cavity | T2N0M0   | N/A | N/A                                 | N | Low  | Low  | Low  |
| 14 | HNC-52 | Larynx      | T2N0     | N/A | N/A                                 | Y | N/A  | N/A  | Low  |
| 15 | HNC-53 | Oropharynx  | T4aN2cM1 | Pos | N/A                                 | Y | N/A  | N/A  | N/A  |
| 16 | HNC-54 | Oral Cavity | T3N2bM0  | N/A | Moderately differentiated           | N | Low  | Low  | High |
| 17 | HNC-61 | Hypopharynx | T2N2bM0  | N/A | Poorly differentiated               | N | N/A  | N/A  | N/A  |
| 18 | HNC-62 | Nasopharynx | T4N2M0   | Neg | Poorly differentiated               | N | N/A  | N/A  | N/A  |
| 19 | HNC-63 | Oropharynx  | T1N2bM0  | Pos | N/A                                 | N | N/A  | N/A  | N/A  |
| 20 | HNC-64 | Oropharynx  | T4N2cM0  | Pos | Undifferentiated                    | Y | Low  | High | High |
| 21 | HNC-65 | Oral Cavity | TxN2cM0  | Neg | Moderately differentiated           | Y | High | Low  | High |
| 22 | HNC-66 | Oropharynx  | T3N2bM0  | Neg | Poorly differentiated               | N | Low  | High | High |
| 23 | HNC-67 | Oral Cavity | T3N0M0   | N/A | Moderately differentiated           | N | High | Low  | High |
| 24 | HNC-70 | Oropharynx  | T2N2bM0  | Pos | Poorly differentiated               | N | Low  | Low  | High |
| 25 | HNC-72 | Oropharynx  | T2N2bM0  | Pos | Poorly differentiated               | N | Low  | High | High |
| 26 | HNC-73 | Oropharynx  | T1N2bM0  | Pos | Poorly differentiated               | N | N/A  | N/A  | N/A  |
| 27 | HNC-74 | Oropharynx  | T4aN2bM0 | Pos | Moderately differentiated           | N | N/A  | N/A  | N/A  |
| 28 | HNC-78 | Oral Cavity | T4aN2bM0 | N/A | Poorly to moderately differentiated | Y | N/A  | N/A  | N/A  |
| 29 | HNC-79 | Oral Cavity | T2N2cM0  | N/A | Moderately differentiated           | N | N/A  | N/A  | N/A  |
| 30 | HNC-83 | Oropharynx  | T1N2bM0  | Pos | Poorly differentiated               | N | N/A  | N/A  | High |
| 31 | HNC-84 | Oropharynx  | T1N2bM0  | Pos | N/A                                 | N | N/A  | N/A  | N/A  |

|    |         |             |          |     |                                     |   |      |      |     |
|----|---------|-------------|----------|-----|-------------------------------------|---|------|------|-----|
| 32 | HNC-85  | Larynx      | T3N2cM0  | N/A | Poorly differentiated               | N | N/A  | N/A  | N/A |
| 33 | HNC-88  | Oral Cavity | T3N0M0   | Neg | Poorly to moderately differentiated | N | N/A  | N/A  | N/A |
| 34 | HNC-89  | Oropharynx  | T2N2bM0  | Pos | Poorly differentiated               | N | N/A  | N/A  | N/A |
| 35 | HNC-90  | Oropharynx  | T4aN2bM0 | Pos | Moderately differentiated           | N | N/A  | N/A  | N/A |
| 36 | HNC-98  | Oral Cavity | N/A      | Pos | N/A                                 | N | N/A  | N/A  | N/A |
| 37 | HNC-103 | Oropharynx  | T2NxMx   | Pos | Poorly differentiated               | Y | Low  | High | Low |
| 38 | HNC-105 | Oropharynx  | T1N1M0   | Pos | Moderately differentiated           | N | High | High | N/A |
| 39 | HNC-108 | Larynx      | T3N0M0   | Neg | Moderately differentiated           | N | N/A  | N/A  | N/A |



**Table S2. CD8<sup>+</sup> T cells from HDs and HNSCC patients chemotax toward CXCL12 similarly.** Activated CD8<sup>+</sup> T cells from HDs (n = 5 donors) and HNSCC patients (n = 6 patients) were exposed to a CXCL12 chemokine gradient and the indicated values were measured. Data are means  $\pm$  SEM. Y-COM, center of mass along the Y-axis, along the chemokine gradient; X-COM, center of mass along the X-axis, perpendicular to the chemokine gradient; FMI<sup>Y</sup>, forward migration index in the direction of the y-axis (it represents the efficiency of forward migration towards the chemokine gradient); FMI<sup>X</sup>, forward migration index in the direction of the x-axis (represents the efficiency of migration perpendicular to the chemokine gradient respectively); directness, the cells' tendency to migrate along a straight line; Euclidian distance, the linear distance between the starting point and ending point of a cell; Accumulated distance, total distance travelled by the cell during the course of the entire microscopy recording.

| Parameter                              | HD (n=5)             | HNSCC (n=6)          | p-value (HD vs HNSCC) |
|----------------------------------------|----------------------|----------------------|-----------------------|
| X-COM ( $\mu\text{m}$ )                | 5.660 $\pm$ 4.739    | -7.125 $\pm$ 9.596   | 0.293                 |
| Y-COM ( $\mu\text{m}$ )                | 43.279 $\pm$ 9.221   | 46.773 $\pm$ 18.178  | 0.876                 |
| FMI <sup>X</sup>                       | 0.016 $\pm$ 0.019    | -0.030 $\pm$ 0.023   | 0.179                 |
| FMI <sup>Y</sup>                       | 0.141 $\pm$ 0.031    | 0.191 $\pm$ 0.039    | 0.362                 |
| Directness                             | 0.203 $\pm$ 0.024    | 0.256 $\pm$ 0.040    | 0.317                 |
| Velocity ( $\mu\text{m}/\text{min}$ )  | 0.210 $\pm$ 0.021    | 0.146 $\pm$ 0.042    | 0.232                 |
| Accumulated distance ( $\mu\text{m}$ ) | 315.462 $\pm$ 31.352 | 211.297 $\pm$ 62.163 | 0.195                 |
| Euclidean distance ( $\mu\text{m}$ )   | 62.122 $\pm$ 6.277   | 38.126 $\pm$ 8.524   | 0.057                 |

**Table S3. Electrophysiological parameters of resting and activated CD8<sup>+</sup> T cells isolated from HD and HNSCC patients.** The cell capacitance, KCa3.1 conductance (normalized to cell capacitance, conductance/capacitance), and Kv1.3 current density (peak current/capacitance) information for resting and activated CD8<sup>+</sup> T cells from HD and HNSCC patients. Data are means  $\pm$  SEM. <sup>a</sup>  $P < 0.001$ , <sup>b</sup>  $P < 0.001$  <sup>c</sup>  $P = 0.332$  vs. activated HD, <sup>d</sup>  $P < 0.001$ , <sup>e</sup>  $P = 0.207$ , <sup>f</sup>  $P = 0.557$  vs. activated HNSCC, <sup>g</sup>  $P < 0.001$ , <sup>h</sup>  $P = 0.011$ , <sup>i</sup>  $P = 0.299$  vs. activated HNSCC; <sup>j</sup>  $P < 0.001$ , <sup>k</sup>  $P < 0.001$ , <sup>l</sup>  $P = 0.675$  vs. activated HNSCC. Statistical significance in <sup>d</sup> and <sup>j</sup> determined by Student's t-test, all other p-values measured by Mann-Whitney rank sum test.

|                                                   |       | HD                                                        |                                                         | HNSCC                                                   |                                            |
|---------------------------------------------------|-------|-----------------------------------------------------------|---------------------------------------------------------|---------------------------------------------------------|--------------------------------------------|
| Parameter                                         | Unit  | Resting                                                   | Activated                                               | Resting                                                 | Activated                                  |
| Capacitance                                       | pF    | 2.1 $\pm$ 0.2 <sup>a,g</sup><br>(n=35 cells, 6 donors)    | 6.2 $\pm$ 0.3 <sup>j</sup><br>(n=30 cells, 6 donors)    | 2.2 $\pm$ 0.3 <sup>d</sup><br>(n=17 cells, 4 donors)    | 4.4 $\pm$ 0.3<br>(n=21 cells, 4 donors)    |
| KCa3.1<br>Conductance/capacitance                 | nS/pF | 0.02 $\pm$ 0.02 <sup>b,h</sup><br>(n=34 cells, 6 donors)  | 0.17 $\pm$ 0.02 <sup>k</sup><br>(n=30 cells, 6 donors)  | 0.04 $\pm$ 0.02 <sup>e</sup><br>(n=17 cells, 4 donors)  | 0.07 $\pm$ 0.02<br>(n=21 cells, 4 donors)  |
| Kv1.3 current density<br>Peak current/capacitance | pA/pF | 127.7 $\pm$ 13.2 <sup>c,i</sup><br>(n=27 cells, 5 donors) | 140.0 $\pm$ 36.2 <sup>l</sup><br>(n=25 cells, 5 donors) | 114.9 $\pm$ 13.9 <sup>f</sup><br>(n=17 cells, 4 donors) | 139.3 $\pm$ 36.9<br>(n=21 cells, 4 donors) |
